# Supplementary material
Source: PubMed Central journal article supplement (PMC514501)
Supplement: 7600323s1.pdf [file 7600323s1.pdf]

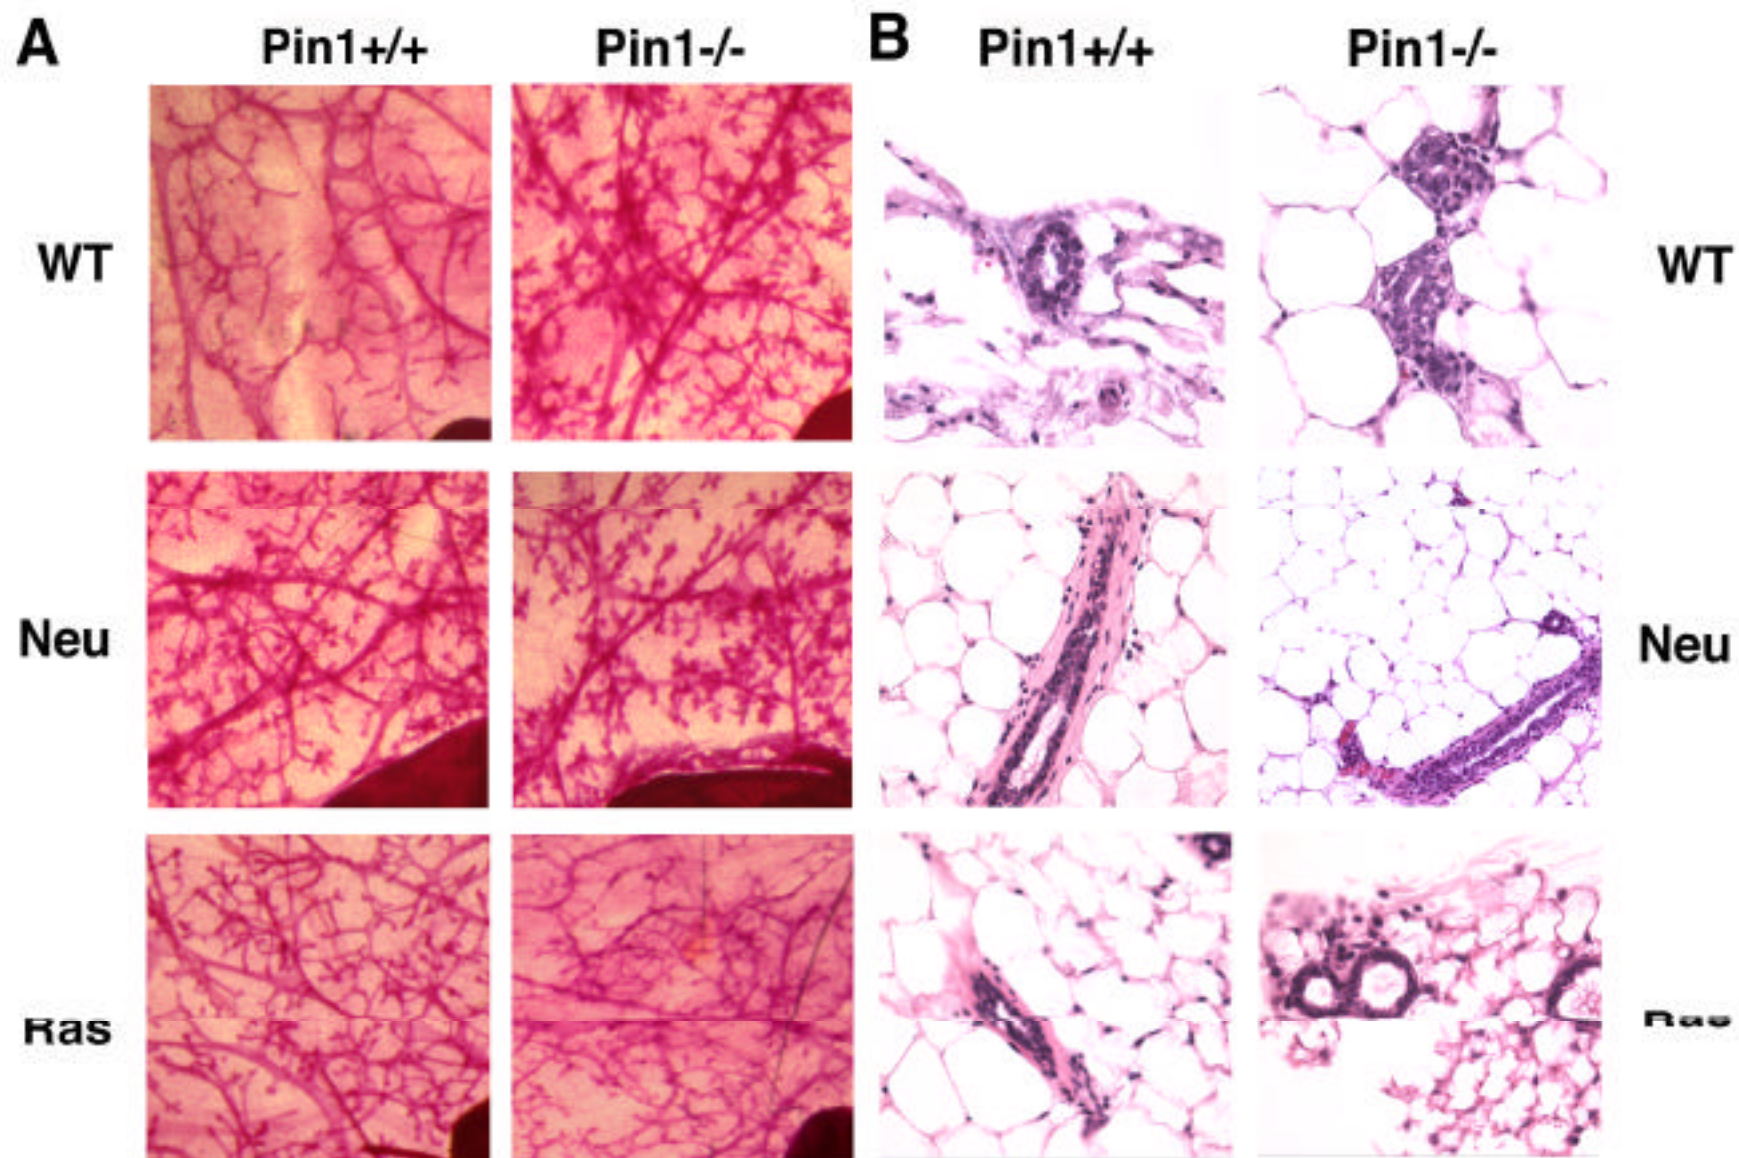

Wulf et al., Fig. S1

**Supplemental Fig. S1. Pin1 ablation does not affect the development of virgin mammary glands.**

The whole mounts of inguinal mammary glands were prepared and the epithelial component was stained with carmine red (A). Histological sections were stained with hematoxylin and eosin (B). Morphology of the mammary glands obtained from virgin mice reveals no differences between the various genotypes.



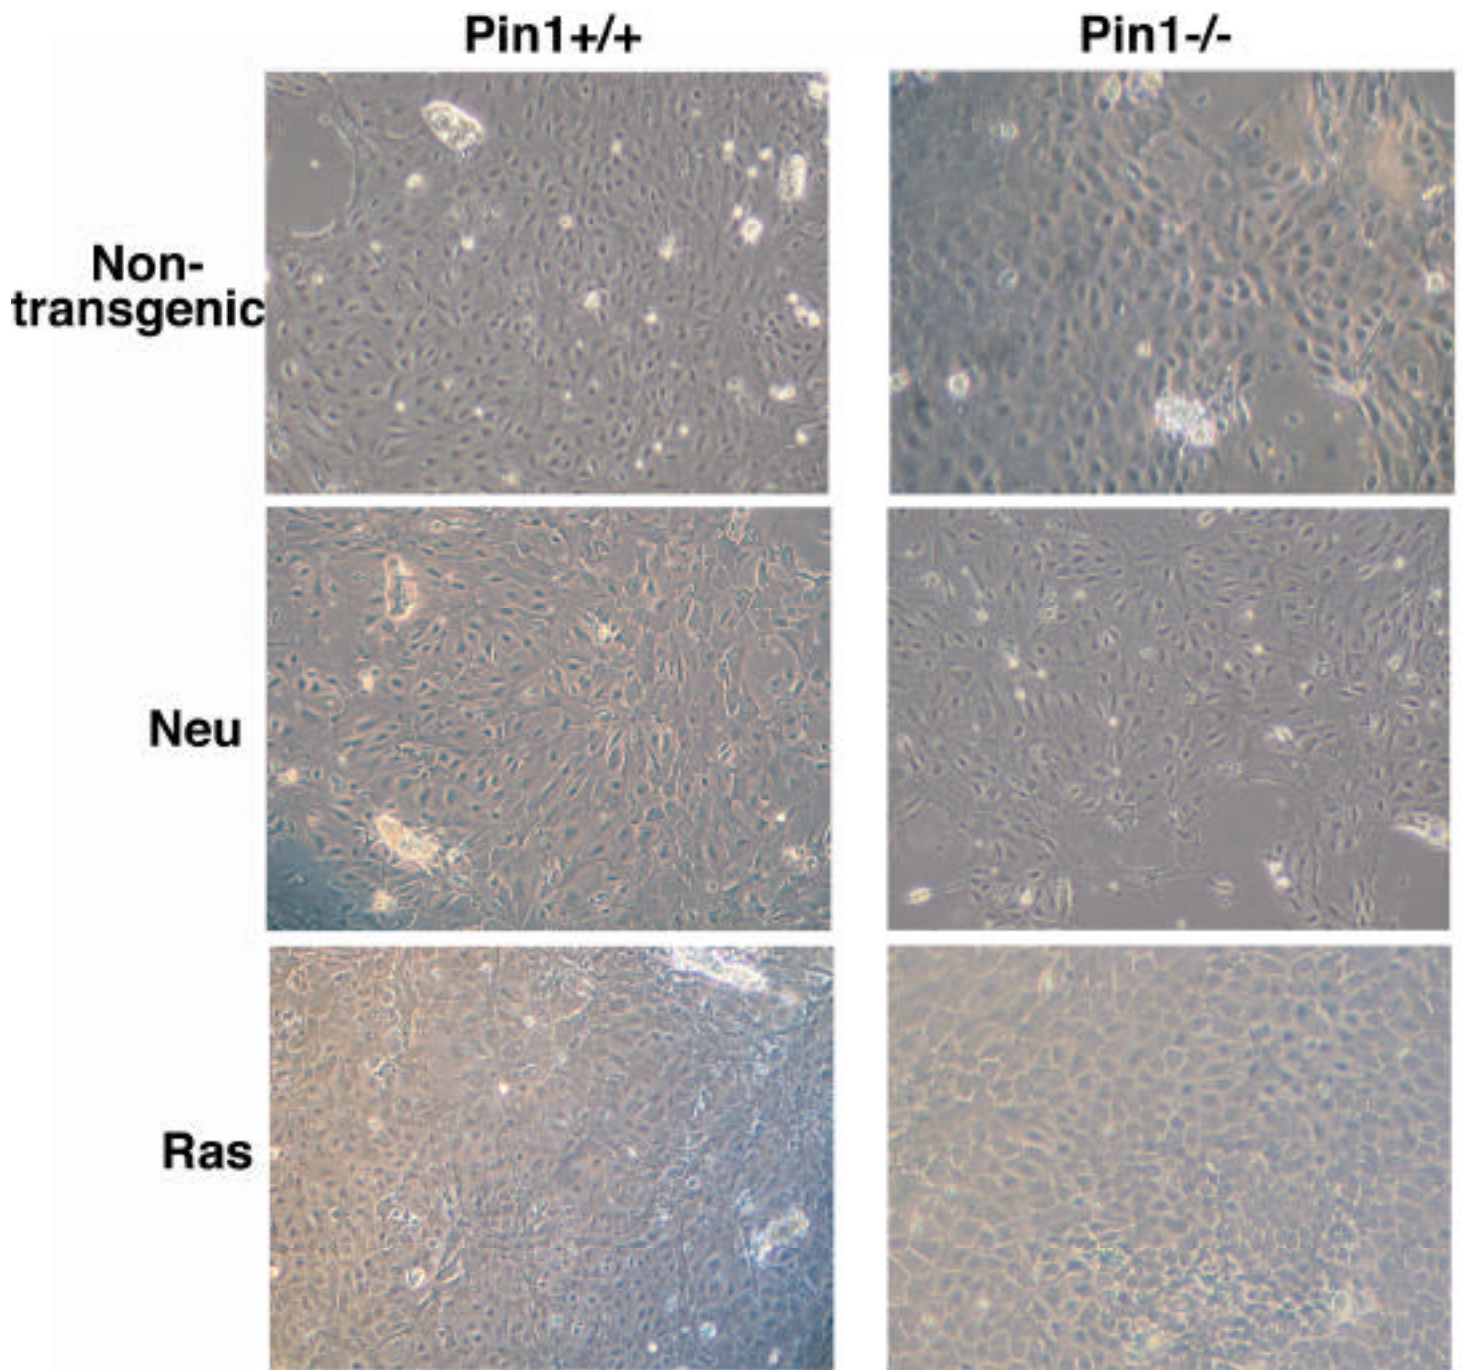

Wulf et al., S2

Supplemental Figure S1. Primary MECs derived from transgenic and non-transgenic mice in Pin1 <sup>+/+</sup> and Pin1 <sup>-/-</sup> genetic background display similar growth patterns in 2D culture.

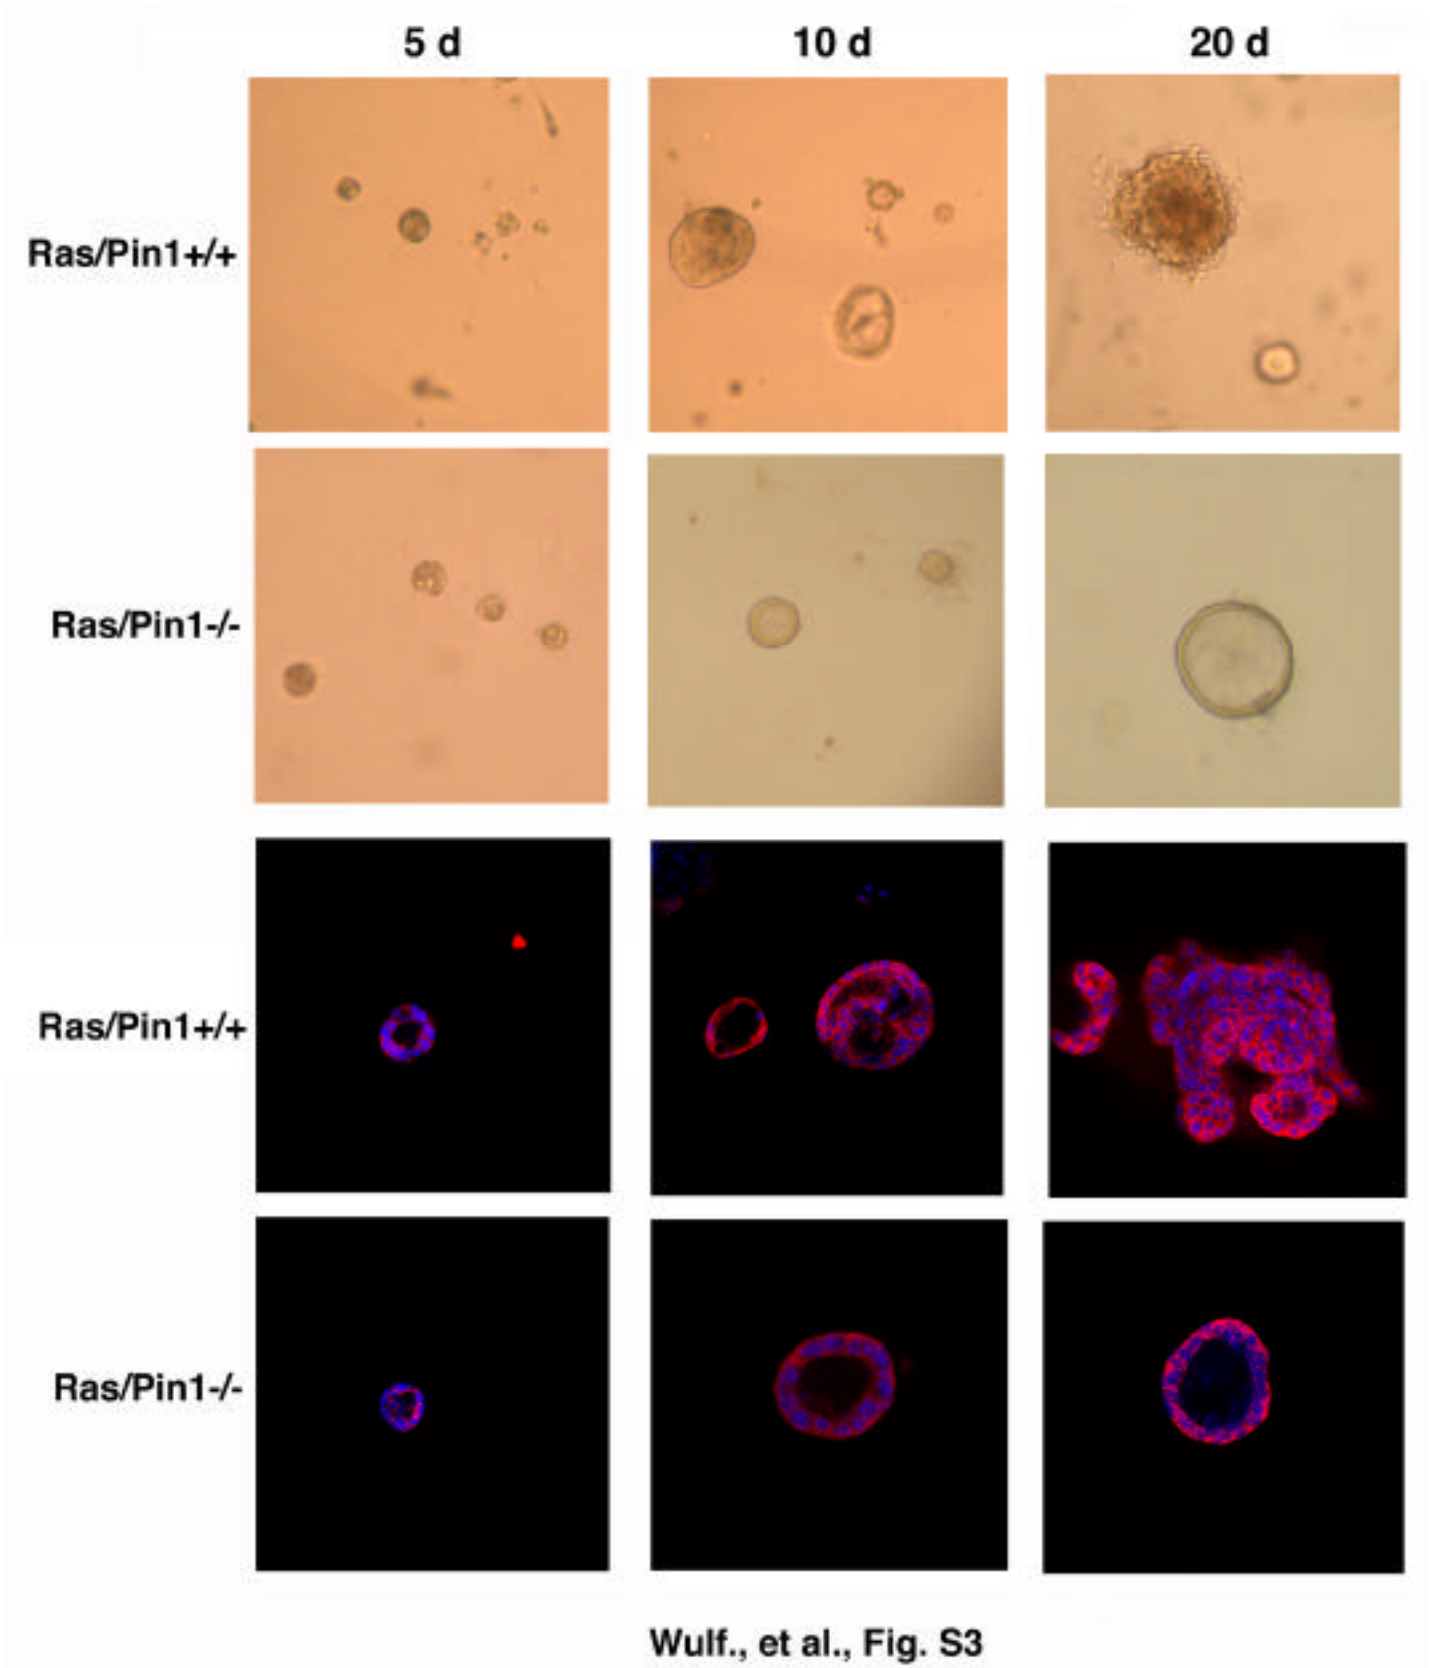

Supplemental Figure S3. Differentiation time course of primary MECs derived from Ras transgenic mice in Pin1<sup>+/+</sup> or Pin1<sup>-/-</sup> genetic background in 3-D cultures.

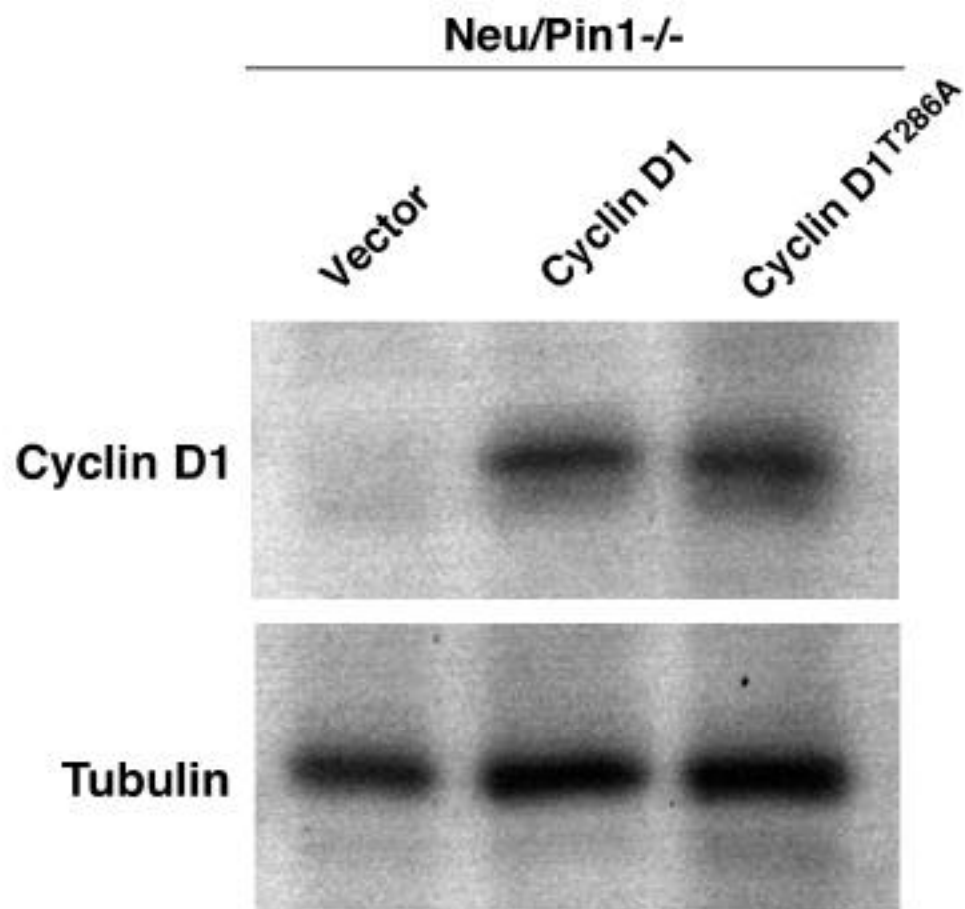

**Wulf et al., S4**

Supplemental Fig. S4. Retroviral infection of primary MECs derived from MMTV-Neu/Pin1<sup>-/-</sup> mice with control vector virus or virus expressing cyclin D1 or its mutant, followed by immunoblotting analysis with anti-cyclin D1 or tubulin antibodies.
